# Supplementary material
Source: Springer Nature journal article supplement (https://www.springermedizin.de/resource/supplementary/13102_2010_67_MOESM2_ESM.pdf/9667670)

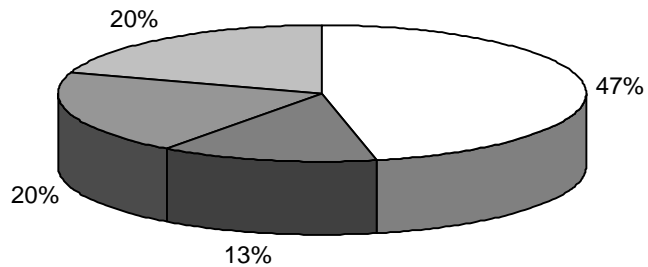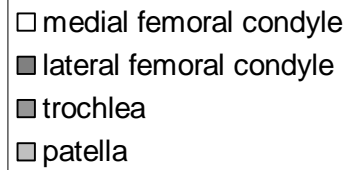

Supplement: MOESM2 [file 9667670]
